# Supplementary material
Source: publisher site journal article supplement (https://www.dovepress.com/get_supplementary_file.php?f=473195.docx)
Supplement: Supplementary file 1 [file get_supplementary_file.php]

**Supplementary Table 1.** Sequencing results of individual discordant results

| **Patient No.** | **Sequence** |
| --- | --- |
| **10** |  |
| Forward | AGTACGTTGATACTCCGGCCGGTGGTCGCCGCGATCAAGGAGTTCTTCGGCACCAGCCAGCCGAGCCAATTCATGGACCAGAACAACCCGCTGTCGGGGTTGACCCACAAGCGCCGACTGTCGGCGCTGGGGCCCGGCGGTCTGTCACGTGAGCGTGCCGGGCTGGAGGTCCGCGACGTGCACCCGTCGCACTACGGCCGGATGTGCCCGATCGAAACCCCTGAGGGGCCCAACATCGGTCTGATCGGCTCGCTGTCGGTGTACGCGCGGGTCAACCCGTTCGGGTTCATCGAAACGCCGTACCGCAACCATCCAACGTA |
| Reverse | GGAACCGACGGGTTGACCCGCGCGTACACCGACAGCGAGCCGATCAGACCGATGTTGGGCCCCTCAGGGGTTTCGATCGGGCACATCCGGCCGTAGTGCGACGGGTGCACGTCGCGGACCTCCAGCCCGGCACGCTCACGTGACAGACCGCCGGGCCCCAGCGCCGACAGTCGGCGCTTGTGGGTCAACCCCGACAGCGGGTTGTTCTGGTCCATGAATTGGCTCGGCTGGCTGGTGCCGAAGAACTCCTTGATCGCGGCGACCACCGGCCGGATGTTGATCAACGTCTGCGGTGTGATCGCCTCCACGCATCCAACGTA |
| **45** |  |
| Forward | CAGTACGTTGATCACTCCGGCCGGTGGTCGCCGCGATCAAGGAGTTCTTCGGCACCAGCCAGCTGAGCCAATTCATGGACCAGAACAACCCGCTGTCGGGGTTGACCGACAAGCGCCGACTGTCGGCGCTGGGGCCCGGCGGTCTGTCACGTGAGCGTGCCGGGCTGGAGGTCCGCGACGTGCACCCGTCGCACTACGGCCGGATGTGCCCGATCGAAACCCCTGAGGGGCCCAACATCGGTCTGATCGGCTCGCTGTCGGTGTACGCGCGGGTCAACCCGTTCGGGTTCATCGAAACGCCGTACCGCAACATCCAACATA |
| Reverse | GGAACCCGGACGGTTGACCCGCGCGTACACCGACAGCGAGCCGATCAGACCGATGTTGGGCCCCTCAGGGGTTTCGATCGGGCACATCCGGCCGTAGTGCGACGGGTGCACGTCGCGGACCTCCAGCCCGGCACGCTCACGTGACAGACCGCCGGGCCCCAGCGCCGACAGTCGGCGCTTGTCGGTCAACCCCGACAGCGGGTTGTTCTGGTCCATGAATTGGCTCAGCTGGCTGGTGCCGAAGAACTCCTTGATCGCGGCGACCACCGGCCGGATGTTGATCAACGTCTGCGGTGTGATCGCCTCAACGCCATCCAACGTA |
| **73** |  |
| Forward | TGTACGGTTGATACTCCGGCCGGTGGTCGCCGCGATCAAGGAGTTCTTCGGCACCAGCCAGCTGAGCCAATTCATGGACCAGAACAACCCGCTGTCGGGGTTGACCCACAAGCGCCGACTGTTGGCGCTGGGGCCCGGCGGTCTGTCACGTGAGCGTGCCGGGCTGGAGGTCCGCGACGTGCACCCGTCGCACTACGGCCGGATGTGCCCGATCGAAACCCCTGAGGGGCCCAACATCGGTCTGATCGGCTCGCTGTCGGTGTACGCGCGGGTCAACCCGTTCGGGTTCATCGAAACGCCGTACCGCAACATCCAACGTA |
| Reverse | GGACGGAACGTGTTGACCCGCGCGTACACCGACAGCGAGCCGATCAGACCGATGTTGGGCCCCTCAGGGGTTTCGATCGGGCACATCCGGCCGTAGTGCGACGGGTGCACGTCGCGGACCTCCAGCCCGGCACGCTCACGTGACAGACCGCCGGGCCCCAGCGCCAACAGTCGGCGCTTGTGGGTCAACCCCGACAGCGGGTTGTTCTGGTCCATGAATTGGCTCAGCTGGCTGGTGCCGAAGAACTCCTTGATCGCGGCGACCACCGGCCGGATGTTGATCAACGTCTGCGGTGTGATCGCCTCAACGCATCCAACGTA |
| **117** |  |
| Forward | CAATACGTTGATACTCCGGCCGGTGGTCGCCGCGATCAAGGAGTTCTTCGGCACCAGCCAGCTGAGCCAATTCATGGACCAGAACAACCCGCTGTCGGGGTTGACCCACAAGCGCCGACTGTCGGCGCTGGGGCCCGGCGGTCTGTCACGTGAGCGTGCCGGGCTGGAGGTCCGCGACGTGCACCCGTCGCACTACGGCCGGATGTGCCCGATCGAAACCCCTGAGGGGCCCAACATCGGTCTGATCGGCTCGCTGTCGGTGTACGCGCGGGTCAACCCGTTCGGGTTCATCGAAACGCCGTACCGCAACAATCCAACGTA |
| Reverse | GGACCGGACGGGTTGACCCGCGCGTACACCGACAGCGAGCCGATCAGACCGATGTTGGGCCCCTCAGGGGTTTCGATCGGGCACATCCGGCCGTAGTGCGACGGGTGCACGTCGCGGACCTCCAGCCCGGCACGCTCACGTGACAGACCGCCGGGCCCCAGCGCCGACAGTCGGCGCTTGTGGGTCAACCCCGACAGCGGGTTGTTCTGGTCCATGAATTGGCTCAGCTGGCTGGTGCCGAAGAACTCCTTGATCGCGGCGACCACCGGCCGGATGTTGATCAACGTCTGCGGTGTGATCGCCTCCACGCATCCAACGTA |
| **120** |  |
| Forward | CGCGGTACATTCTGTACAGAACACCCGCTGTCGGGGTTGACCCACAAGCGCCGACTGTCGGCGCTGGGGCCCGGCGGTCTGTCACGTGAGCGTGCCGGGCTGGAGGTCCGCGACGTGCACCCGTCGCACTACGGCCGGATGTGCCCGATCGAAACCCCTGAGGGGCCCAACATCGGTCTGATCGGCTCGCTGTCGGTGTACGCGCGGGTCAACCCGTTCGGGTTCATCGAAACGCCGTACCGCAAGGTGGTCGACGGCGTGGTTAGCGACGAGATCGTGTACCTGACCGCCGACGAGGAGGACCGCCACGTGGTGGCACAGGAAAATTCGCCGAA |
| Reverse | CACGATCGGCGGTCAGGTACACGATCTCGTCGCTAACCACGCCGTCGACCACCTTGCGGTACGGCGTTTCGATGAACCCGAACGGGTTGACCCGCGCGTACACCGACAGCGAGCCGATCAGACCGATGTTGGGCCCCTCAGGGGTTTCGATCGGGCACATCCGGCCGTAGTGCGACGGGTGCACGTCGCGGACCTCCAGCCCGGCACGCTCACGTGACAGACCGCCGGGCCCCAGCGCCGACAGTCGGCGCTTGTGGGTCAACCCCGACAGCGGGTTGTTCTGGTACATGAATTGGCTCAGCTGGCTGGTGCCGAGGAAACTCCTTGA |
